# Supplementary material for: Sacubitril/Valsartan Induces Global Cardiac Reverse Remodeling in Long-Lasting Heart Failure with Reduced Ejection Fraction: Standard and Advanced Echocardiographic Evidences
Source: PubMed Central journal article supplement (PMC7230879; doi:10.3390/jcm9040906), 2020-03-25
Supplement: jcm-09-00906-s001.pdf [file jcm-09-00906-s001.pdf]

## Supplementary Materials

**Supplementary Table S1.** Intraclass Correlation Coefficients (ICC) results.

|           | Intra-Observer<br>ICC (95% CI) | Inter-Observer<br>ICC (95% CI) |
|-----------|--------------------------------|--------------------------------|
| LVGLS (%) | 0.74 (0.51–0.89)               | 0.92 (0.81–0.95)               |
| PALS (%)  | 0.98 (0.97–0.99)               | 0.98 (0.96–0.99)               |

LVGLS, left ventricular longitudinal strain; PALS, peak atrial longitudinal strain.

**Supplementary Table S2.** Univariable analysis for LARR.

|                                                | LARR (N = 33) | No LARR (N = 37) | OR (95% C.I.)       | p value |
|------------------------------------------------|---------------|------------------|---------------------|---------|
| Male sex, no. (%)                              | 8 (24.2 %)    | 8 (21.6%)        | 1.16 (0.380–3.543)  | 0.794   |
| Age (years)                                    | 68 ± 11       | 64 ± 13          | 1.0380(0.986–1.075) | 0.185   |
| Duration of the disease (months)               | 95 (13 – 192) | 136(39 – 194)    | 1.002 (0.997–1.007) | 0.360   |
| Follow up (months)                             | 9.3 ± 5.5     | 10.8 ± 5.6       | 0.971 (0.894–1.054) | 0.971   |
| HR (bpm)                                       | 67.7 ± 11     | 68.6 ± 11        | 0.987 (0.940–1.035) | 0.585   |
| SBP (mmHg)                                     | 120 ± 12      | 121 ± 15         | 0.995 (0.961–1.030) | 0.775   |
| DBP (mmHg)                                     | 71 ± 8        | 74 ± 7           | 0.955(0.894–1.019)  | 0.955   |
| COPD, no. (%)                                  | 8 (24.2%)     | 4 (10.8%)        | 2.640 (0.714–9.764) | 0.146   |
| Diabetes mellitus, no. (%)                     | 17 (51.5%)    | 14 (37.8 %)      | 1.746 (0.673–4.525) | 0.317   |
| Hypertension, no. (%)                          | 20 (60.6%)    | 18 (48.6%)       | 1.624 (0.628–4.200) | 0.317   |
| IHD, no. (%)                                   | 19 (57.6)     | 24 (64.9%)       | 0.735 (0.280–1.077) | 0.532   |
| NYHA Class (average)                           | 2.2 ± 0.41    | 2.3 ± 0.46       | 0.636 (0.213–1.897) | 0.417   |
| History of AF, no. (%)                         | 10 (30.3%)    | 15 (40.5 %)      | 1.111 (0.391–3.161) | 0.843   |
| Creatinine (mg/dL)                             | 1.25 ± 0.61   | 1.23 ± 0.4       | 0.923 (0.317–2.688) | 0.883   |
| BNP (pg/mL)                                    | 262 (116-679) | 231(133–546)     | 1.000 (0.998–1.003) | 0.779   |
| ACE-I/ARB (Ramipril dose equivalent), mg       | 4.9 ± 2.1     | 6 ± 3.9          | 1.124 (0.905–1.286) | 0.091   |
| Beta-blockers, no. (%)                         | 30 (90.9%)    | 35 (94.6%)       | 0.571 (0.089–3.650) | 0.554   |
| Beta-blockers (bisoprolol dose equivalent), mg | 3.7 ± 2.5     | 3.4 ± 2.4        | 0.571 (0.089–3.650) | 0.554   |
| Sacubitril/Valsartan full dose, no. (%)        | 18 (54.5%)    | 15 (40.5%)       | 1.21 (0.962–1.42)   | 0.07    |
| MRA, no. (%)                                   | 24 (64.9%)    | 20 (60.6%)       | 0.833 (0.316–2.201) | 0.713   |
| Diuretics, no. (%)                             | 28 (84.8%)    | 32 (86.5%)       | 0.875 (0.229–3.339) | 0.875   |
| Diuretics (furosemide dose equivalent), mg     | 49 ± 54       | 50 ± 71          | 1.000 (0.993–1.008) | 0.928   |
| Ivabradine, no. (%)                            | 4 (12.1%)     | 6 (16.2%)        | 0.713 (0.182–2.784) | 0.626   |
| CRT, no. (%)                                   | 13 (39.4%)    | 10 (27%)         | 1.755 (0.641–4.804) | 0.274   |
| LVEF (%)                                       | 28 ± 5        | 28 ± 6           | 0.985 (0.913–1.063) | 0.697   |
| LVEDVi (mL/m <sup>2</sup> )                    | 102 ± 40      | 102 ± 32         | 1.000 (0.987–1.013) | 0.973   |
| LVESVi (mL/m <sup>2</sup> )                    | 74 ± 34       | 75 ± 38          | 0.999 (0.984–1.015) | 0.915   |
| LAESA (cm <sup>2</sup> )                       | 29 ± 7        | 27 ± 9           | 0.976 (0.912–1.045) | 0.260   |
| LAESV (mL)                                     | 121 ± 46      | 100 ± 52         | 1.009 (0.999–1.019) | 0.089   |
| RAESA (cm <sup>2</sup> )                       | 19 ± 5.1      | 18 ± 5.8         | 1.049 (0.959–1.149) | 0.296   |
| E/E'                                           | 17.5 ± 11     | 15.3 ± 7         | 1.029 (0.970–1.092) | 0.346   |
| Restrictive pattern, no. (%)                   | 6(19%)        | 7(21,9%)         | 0.857 (0.252–2.913) | 0.805   |
| RVFAC (%)                                      | 41 ± 10       | 39 ± 13          | 1.009 (0.959–1.061) | 0.732   |
| TAPSE (mm)                                     | 21 ± 6        | 19 ± 4.2         | 1.075 (0.951–1.216) | 0.249   |
| PAPs (mmHg)                                    | 45 ± 18       | 38 ± 17          | 1.022 (0.986–1.060) | 0.239   |

HR, heart rate; SBP systolic blood pressure; DBP, diastolic blood pressure; COPD, chronic obstructive pulmonary disease; IHD, ischaemic heart disease; NYHA, New York Heart Association;; AF, atrial fibrillation; BNP, B-type natriuretic peptide; ACE-i, angiotensin converting enzyme inhibitors; ARB, angiotensin receptor blockers; MRA mineral corticoid antagonists; CRT, cardiac resynchronization therapy; LVEF, left ventricular ejection fraction; LVEDVi, left ventricular end-diastolic volume indexed; LVESVi, left ventricular end-systolic volume indexed; LAESA, left atrial end-systolic area;

LAESV, left atrial end-systolic volume; RAESA, right atrial end-systolic area; RVFAC right ventricular fractional area change; TAPSE tricuspid systolic annulus excursion; PAPs systolic pulmonary artery systolic pressure.
